# Supplementary material for: Human Neutral Genetic Variation and Forensic STR Data
Source: PubMed Central journal article supplement (PMC3504113; doi:10.1371/journal.pone.0049666), 2012-11-21
Supplement: pone.0049666.s004.pdf [file pone.0049666.s004.pdf]

**Table S1: Frequency dataset description.** The designations and information presented for populations are based on the original publications and the online source of the data ([www.strdna-db.org](http://www.strdna-db.org)). Geographic coordinates were assigned in this work.

| <i>Geographic Group</i>                     | <i>Population description</i> <sup>1</sup> | <i>Sampling location</i> | <i>Sample Size</i> <sup>2</sup> | <i>Longitude</i> <sup>3</sup> | <i>Latitude</i> <sup>4</sup> | <i>Reference</i> | <i>ID</i> |
|---------------------------------------------|--------------------------------------------|--------------------------|---------------------------------|-------------------------------|------------------------------|------------------|-----------|
| <i>North Africa</i><br>( <i>NAF</i> )       | Berber                                     | Siwa                     | 98                              | 25.5                          | 29.2                         | [1]              | 1         |
|                                             | Muslim                                     | Adayma                   | 99                              | 32.6                          | 25.2                         | [1]              | 2         |
|                                             | Copt                                       | Adayma                   | 100                             | 32.6                          | 25.2                         | [1]              | 3         |
|                                             | Berber                                     | Asni                     | 105                             | -8.0                          | 31.2                         | [2]              | 4         |
|                                             | Berber                                     | Sidi Bouhria             | 104                             | -2.3                          | 34.9                         | [2]              | 5         |
|                                             | Berber                                     | Makthar                  | 42.8 (0.9)                      | 9.2                           | 35.9                         | [3]              | 6         |
|                                             | Arab                                       | Zaghouan                 | 44.6 (0.7)                      | 10.1                          | 36.4                         | [3]              | 7         |
|                                             | Arab                                       | Casablanca               | 133.2 (4.7)                     | -7.6                          | 33.6                         | [4]              | 8         |
|                                             | All                                        | Sohag                    | 265                             | 31.7                          | 26.6                         | [5]              | 9         |
| <i>Sub-saharan Africa</i><br>( <i>SAF</i> ) | Ovambo - Bantu                             | Windhoek                 | 195                             | 17.1                          | -22.6                        | [6]              | 10        |
|                                             | Caucasian*                                 | Cape Town                | 98                              | 18.4                          | -33.9                        | [7]              | 11        |
|                                             | sub-Saharan                                | Bata                     | 134                             | 9.8                           | 1.9                          | [8]              | 12        |

|                                 |                           |               |              |       |       |      |    |
|---------------------------------|---------------------------|---------------|--------------|-------|-------|------|----|
|                                 | sub-Saharan               | Cabinda       | 110          | 15.0  | -9.2  | [9]  | 13 |
|                                 | sub-Saharan               | Maputo        | 142.2 (0.6)  | 32.6  | -26.0 | [10] | 14 |
|                                 | sub-Saharan               | Bissau        | 100          | -15.6 | 11.9  | [11] | 15 |
|                                 | Hutu                      | Kigali        | 50.9 (1.0)   | 30.1  | -1.9  | [12] | 16 |
|                                 | All                       | Dar es Salaam | 208.4 (25.8) | 39.3  | -6.8  | [13] | 17 |
|                                 | Karimojong - Jie - Dodoth | Kotido        | 218          | 34.1  | 3.0   | [14] | 18 |
|                                 | sub-Saharan               | Mogadishu     | 404          | 45.3  | 2.1   | [15] | 19 |
| <i>Southwest Asia</i><br>(SWAS) | Caucasian                 | Dubai         | 224          | 55.3  | 25.3  | [16] | 20 |
|                                 | Arab                      | Riyadh        | 93.9 (0.3)   | 46.7  | 24.7  | [16] | 21 |
|                                 | Arab                      | Muscat        | 79           | 58.6  | 23.6  | [16] | 22 |
|                                 | Arab                      | Sana'a        | 101          | 44.2  | 15.4  | [16] | 23 |
|                                 | Arab                      | Tehran        | 93           | 51.4  | 35.7  | [16] | 24 |
|                                 | Caucasian                 | Van           | 116          | 43.4  | 38.5  | [17] | 25 |
|                                 | Caucasian                 | Ankara        | 198          | 32.4  | 39.7  | [18] | 26 |
|                                 | Arab                      | Damascus      | 117.2 (3.3)  | 36.3  | 33.5  | [4]  | 27 |
|                                 | All                       | Doha          | 120          | 51.5  | 25.3  | [19] | 28 |
| <i>South Asia</i><br>(SAS)      | South Asians              | Kabul         | 307.2 (44.1) | 69.2  | 34.5  | [20] | 29 |
|                                 | South Asians              | Thimphu       | 936          | 89.7  | 27.4  | [21] | 30 |
|                                 | South Asians*             | Kathmandu     | 953          | 85.3  | 27.7  | [21] | 31 |

|                 |                |             |      |      |      |    |
|-----------------|----------------|-------------|------|------|------|----|
| Sherpa          | Namche Bazaar  | 105         | 86.8 | 27.9 | [22] | 32 |
| South Asians    | Kathmandu      | 111         | 85.3 | 27.7 | [22] | 33 |
| South Asians    | Dhaka          | 127         | 90.4 | 23.7 | [23] | 34 |
| Gadaba          | Orissa         | 56.0 (1.5)  | 84.6 | 20.2 | [24] | 35 |
| KuviKhond       | Orissa         | 46.2 (5.3)  | 84.6 | 20.2 | [24] | 36 |
| Paroja          | Orissa         | 53.1 (1.3)  | 84.6 | 20.2 | [25] | 37 |
| Lotha - Naga    | Nagaland       | 101.0 (2.4) | 94.4 | 26.2 | [24] | 38 |
| Baniya          | Bihar          | 90          | 85.9 | 25.9 | [26] | 39 |
| Reddy           | Andhra Pradesh | 17.9 (3.4)  | 80.8 | 16.2 | [27] | 40 |
| Sakunapakshollu | Andhra Pradesh | 21.5 (2.5)  | 80.8 | 16.2 | [27] | 41 |
| Naga            | Nagaland       | 15.2 (2.8)  | 94.4 | 26.2 | [27] | 42 |
| IyengarBrahmin  | Karnataka      | 65          | 76.3 | 15.0 | [28] | 43 |
| Muslim*         | Karnataka      | 45          | 76.3 | 15.0 | [28] | 44 |
| Juangs          | Orissa         | 50          | 84.6 | 20.2 | [25] | 45 |
| Paroja          | Orissa         | 77.6 (0.9)  | 84.6 | 20.2 | [24] | 46 |
| Saora           | Orissa         | 35          | 84.6 | 20.2 | [25] | 47 |
| Kashmiri        | Lahore         | 125         | 74.3 | 31.6 | [29] | 48 |
| Brahmin         | Madhya Pradesh | 110         | 78.7 | 23.0 | [30] | 49 |
| Rajbanshi       | West Bengal    | 90.7 (0.8)  | 87.9 | 23.0 | [31] | 50 |

|                                  |                         |                |             |       |      |      |      |    |
|----------------------------------|-------------------------|----------------|-------------|-------|------|------|------|----|
|                                  | Dhimal                  | West Bengal    | 65.8 (0.6)  | 87.9  | 23.0 | [32] | 51   |    |
|                                  | Kora                    | West Bengal    | 59          | 87.9  | 23.0 | [32] | 52   |    |
|                                  | Maheli                  | West Bengal    | 49          | 87.9  | 23.0 | [31] | 53   |    |
|                                  | Southeast Asians        | Java           | 105         | 109.9 | -7.3 | [23] | 54   |    |
|                                  | Malay                   | Kuala Lumpur   | 210         | 101.7 | 3.2  | [33] | 55   |    |
|                                  | Southeast Asians        | Quezon City    | 106         | 121.1 | 14.7 | [34] | 56   |    |
|                                  | Southeast Asians        | Hanoi          | 178         | 105.8 | 21.0 | [35] | 57   |    |
|                                  | Southeast Asians        | Bangkok        | 210         | 100.5 | 13.7 | [36] | 58   |    |
|                                  | Indian*                 | Singapore city | 174         | 103.9 | 1.3  | [37] | 59   |    |
| <i>Southeast Asia<br/>(SEAS)</i> | Malay                   | Singapore city | 197         | 103.9 | 1.3  | [38] | 60   |    |
|                                  | Chinese*                | Singapore city | 209         | 103.9 | 1.3  | [39] | 61   |    |
|                                  | Chinese*                | Singapore city | 184         | 103.9 | 1.3  | [40] | 62   |    |
|                                  | Malay                   | Singapore city | 160.7 (1.1) | 103.9 | 1.3  | [40] | 63   |    |
|                                  | Malay                   | Kuala Lumpur   | 110         | 101.7 | 3.2  | [41] | 64   |    |
|                                  | Iban                    | Petra Jaya     | 195         | 110.3 | 1.6  | [42] | 65   |    |
|                                  | Bidayuh                 | Petra Jaya     | 195         | 110.3 | 1.6  | [42] | 66   |    |
|                                  | Melanau                 | Petra Jaya     | 128         | 110.3 | 1.6  | [42] | 67   |    |
|                                  | <i>Europe<br/>(EUR)</i> | Caucasian      | Leuven      | 222   | 4.7  | 50.9 | [43] | 68 |
|                                  |                         | Romanies*      | Debrecen    | 110   | 21.6 | 47.5 | [44] | 69 |
| Ashkenazi*                       |                         | Budapest       | 178         | 19.0  | 47.5 | [44] | 70   |    |

|           |                      |              |       |      |      |    |
|-----------|----------------------|--------------|-------|------|------|----|
| Caucasian | Sicily               | 220          | 13.8  | 37.2 | [45] | 71 |
| Caucasian | Barcelona            | 203.9 (0.3)  | 2.2   | 41.4 | [46] | 72 |
| Caucasian | Biscay               | 71.3 (1.8)   | -2.9  | 43.2 | [47] | 73 |
| Caucasian | Seville              | 198.1 (2.5)  | -6.0  | 37.4 | [48] | 74 |
| Caucasian | Madrid               | 338.0 (4.1)  | -3.7  | 40.4 | [49] | 75 |
| Caucasian | Huelva               | 114          | -6.9  | 37.3 | [50] | 76 |
| Caucasian | Funchal              | 125.1 (47.7) | -16.9 | 32.6 | [51] | 77 |
| Caucasian | Angra do<br>Heroismo | 98.9 (1.0)   | -27.2 | 38.7 | [52] | 78 |
| Caucasian | Porto                | 200          | -8.6  | 41.2 | [53] | 79 |
| Caucasian | Novi Sad             | 100          | 19.9  | 45.3 | [54] | 80 |
| Caucasian | Skopje               | 100          | 21.4  | 42.0 | [55] | 81 |
| Romanies* | Skopje               | 102          | 21.4  | 42.0 | [55] | 82 |
| Caucasian | Minsk                | 176          | 27.6  | 54.0 | [56] | 83 |
| Caucasian | Sarajevo             | 183.2 (41.8) | 18.4  | 43.9 | [57] | 84 |
| Caucasian | Sarajevo             | 100          | 18.4  | 43.9 | [58] | 85 |
| Romanies* | Cakovec              | 100          | 16.4  | 46.4 | [59] | 86 |
| Caucasian | Gdansk               | 145          | 18.6  | 54.4 | [60] | 87 |
| Caucasian | Warsaw               | 430          | 21.0  | 52.2 | [61] | 88 |

|           |                  |               |       |      |      |     |
|-----------|------------------|---------------|-------|------|------|-----|
| Caucasian | Warsaw           | 870           | 21.0  | 52.2 | [62] | 89  |
| Albanians | Pristina         | 136           | 21.2  | 42.7 | [63] | 90  |
| Caucasian | Seville          | 47.8 (5.0)    | -6.0  | 37.4 | [64] | 91  |
| Caucasian | Stockholm        | 306.8 (6.4)   | 18.1  | 59.3 | [65] | 92  |
| Caucasian | Athens           | 298.3 (0.5)   | 23.7  | 38.0 | [66] | 93  |
| Caucasian | Presov           | 137.2 (1.6)   | 21.2  | 49.0 | [67] | 94  |
| Gipsy*    | Presov           | 137.2 (1.6)   | 21.2  | 49.0 | [67] | 95  |
| Caucasian | Lodz             | 1000          | 19.5  | 51.8 | [68] | 96  |
| Caucasian | Pomorze          | 600           | 14.5  | 53.4 | [69] | 97  |
|           | Zachodnie        |               |       |      |      |     |
| Caucasian | Minsk            | 1085.5 (38.8) | 27.6  | 54.0 | [70] | 98  |
| Caucasian | Zagreb           | 200           | 16.0  | 45.8 | [71] | 99  |
| Caucasian | Coimbra          | 2113.5 (16.1) | -8.4  | 40.2 | [72] | 100 |
| Caucasian | Ponta Delgada    | 473.9 (1.8)   | -25.7 | 37.7 | [72] | 101 |
| Caucasian | Pskov            | 62            | 28.3  | 57.8 | [73] | 102 |
| Caucasian | Velikiy Novgorod | 59            | 32.1  | 57.6 | [73] | 103 |
| Caucasian | Saratov          | 52            | 46.0  | 51.5 | [73] | 104 |
| Caucasian | Vody             | 60            | 43.1  | 44.2 | [73] | 105 |

---

|                     |                  |           |                |       |       |      |     |
|---------------------|------------------|-----------|----------------|-------|-------|------|-----|
|                     | Altaiian         | Kemerovo  | 68             | 86.1  | 55.4  | [74] | 106 |
|                     | Tofalar          | Kemerovo  | 35             | 86.1  | 55.4  | [74] | 107 |
|                     | Sojot            | Kemerovo  | 29             | 86.1  | 55.4  | [74] | 108 |
|                     | Khakas           | Kemerovo  | 50.9 (0.3)     | 86.1  | 55.4  | [74] | 109 |
|                     | Buryat           | Kemerovo  | 78             | 86.1  | 55.4  | [74] | 110 |
| <i>Central Asia</i> | Altaiian - Kizhi | Kemerovo  | 80             | 86.1  | 55.4  | [74] | 111 |
| <i>(CAS)</i>        | Mongol           | Kemerovo  | 39.9 (7.5)     | 86.1  | 55.4  | [74] | 112 |
|                     | Tuva             | Kemerovo  | 78.8 (4.4)     | 86.1  | 55.4  | [74] | 113 |
|                     | Chukcha          | Kemerovo  | 15             | 86.1  | 55.4  | [74] | 114 |
|                     | Even             | Kemerovo  | 14             | 86.1  | 55.4  | [74] | 115 |
|                     | Khamnigan        | Kemerovo  | 94.9 (0.3)     | 86.1  | 55.4  | [74] | 116 |
|                     | Koreans*         | Kemerovo  | 49             | 86.1  | 55.4  | [74] | 117 |
|                     | Aboriginal       | Winnellie | 1106.0 (159.4) | 130.9 | -12.4 | [75] | 118 |
| <i>Australia</i>    | Asian*           | Winnellie | 342.9 (167.8)  | 130.9 | -12.4 | [75] | 119 |
| <i>(AUS)</i>        | East Timorese*   | Winnellie | 258.0 (34.2)   | 130.9 | -12.4 | [75] | 120 |

|                               |                   |                  |             |        |      |      |     |
|-------------------------------|-------------------|------------------|-------------|--------|------|------|-----|
| <i>North America</i><br>(NAM) | Athabaskan        | Juneau           | 101         | -134.6 | 58.4 | [76] | 121 |
|                               | Inupiat           | Juneau           | 109         | -134.6 | 58.4 | [76] | 122 |
|                               | Yupik             | Juneau           | 100         | -134.6 | 58.4 | [76] | 123 |
|                               | African American* | Minnesota        | 157         | -94.7  | 46.7 | [77] | 124 |
|                               | Hispanic*         | Minnesota        | 151         | -94.7  | 46.7 | [77] | 125 |
|                               | Native American   | Minnesota        | 203         | -94.7  | 46.7 | [77] | 126 |
| <i>East Asia</i><br>(EAS)     | Asian             | Saitama          | 164         | 139.6  | 35.9 | [78] | 127 |
|                               | Hmar              | Ulaanbaatar      | 80          | 106.9  | 47.9 | [79] | 128 |
|                               | Mara              | Ulaanbaatar      | 90          | 106.9  | 47.9 | [79] | 129 |
|                               | Lai               | Ulaanbaatar      | 92          | 106.9  | 47.9 | [79] | 130 |
|                               | Lusei             | Ulaanbaatar      | 92          | 106.9  | 47.9 | [79] | 131 |
|                               | Tibetan           | Xining           | 850         | 101.8  | 36.6 | [80] | 132 |
|                               | Chinese*          | Hong Kong Island | 325         | 114.2  | 22.3 | [81] | 133 |
|                               | Chinese           | Shantou          | 286.2 (2.9) | 116.7  | 23.4 | [82] | 134 |
|                               | Miao              | Guangzhou        | 140.9 (0.3) | 113.3  | 23.1 | [83] | 135 |
|                               | Yi                | Guangzhou        | 164.8 (0.4) | 113.3  | 23.1 | [83] | 136 |
| Hui                           | Guangzhou         | 143.8 (0.4)      | 113.3       | 23.1   | [83] | 137  |     |
| Han                           | Shantou           | 121.5 (1.1)      | 116.7       | 23.4   | [82] | 138  |     |

|                                                |                    |           |              |       |       |      |     |
|------------------------------------------------|--------------------|-----------|--------------|-------|-------|------|-----|
|                                                | Chinese            | Chengdu   | 200          | 104.1 | 30.7  | [84] | 139 |
|                                                | Chinese*           | Suzhou    | 100          | 120.6 | 31.3  | [85] | 140 |
|                                                | Salar              | Qinghai   | 97.3 (1.9)   | 101.8 | 36.6  | [86] | 141 |
|                                                | Han                | Henan     | 207.9 (0.3)  | 113.7 | 34.8  | [87] | 142 |
|                                                | Yi                 | Yunnan    | 120          | 102.7 | 25.0  | [88] | 143 |
|                                                | Tujia              | Hunan     | 98           | 113.0 | 28.2  | [89] | 144 |
|                                                | Han                | Guangzhou | 501          | 113.3 | 23.1  | [90] | 145 |
|                                                | Han                | Yunnan    | 95.1 (1.0)   | 102.7 | 25.0  | [91] | 146 |
|                                                | Han                | Yunnan    | 113.2 (16.3) | 102.7 | 25.0  | [91] | 147 |
|                                                | Nu                 | Yunnan    | 68.9 (9.9)   | 102.7 | 25.0  | [91] | 148 |
|                                                | Tibetan            | Yunnan    | 55.1 (11.4)  | 102.7 | 25.0  | [91] | 149 |
|                                                | DuLong             | Yunnan    | 41.0 (6.4)   | 102.7 | 25.0  | [91] | 150 |
|                                                | Lisu               | Yunnan    | 49.8 (0.6)   | 102.7 | 25.0  | [91] | 151 |
|                                                | Yi                 | Yunnan    | 43.5 (6.3)   | 102.7 | 25.0  | [91] | 152 |
|                                                | Han                | Shaanxi   | 446          | 108.4 | 35.6  | [92] | 153 |
|                                                | Han                | Liaoning  | 358          | 123.4 | 41.8  | [93] | 154 |
| <b><i>Central and South America (CSAM)</i></b> | Amerindian Kichwas | Quito     | 115          | -78.5 | -0.2  | [94] | 155 |
|                                                | All*               | Lima      | 100          | -77.0 | -12.1 | [95] | 156 |
|                                                | All*               | San Jose  | 496          | -84.1 | 9.9   | [96] | 157 |

|                        |              |               |       |       |       |     |
|------------------------|--------------|---------------|-------|-------|-------|-----|
| All*                   | San Salvador | 228           | -89.2 | 13.7  | [97]  | 158 |
| Conchagua              | San Salvador | 49            | -89.2 | 13.7  | [98]  | 159 |
| Indigenous SanAlejo    | San Salvador | 52.9 (0.3)    | -89.2 | 13.7  | [98]  | 160 |
| Indigenous Panchimalco | San Salvador | 35            | -89.2 | 13.7  | [98]  | 161 |
| Indigenous Izalco      | San Salvador | 36            | -89.2 | 13.7  | [98]  | 162 |
| All*                   | Caracas      | 255           | -66.9 | 10.5  | [99]  | 163 |
| All*                   | Maracaibo    | 203           | -71.6 | 10.6  | [100] | 164 |
| All*                   | Santander    | 309.2 (138.3) | -73.5 | 6.9   | [101] | 165 |
| All*                   | Antioquia    | 364           | -75.5 | 7.2   | [102] | 166 |
| All*                   | Neuquen      | 111           | -68.1 | -38.9 | [103] | 167 |
| All*                   | Buenos Aires | 502.5 (26.5)  | -58.4 | -34.6 | [104] | 168 |
| All*                   | Santa Fe     | 549.2 (30.4)  | -60.7 | -31.7 | [104] | 169 |
| All*                   | Formosa      | 75.9 (4.7)    | -58.2 | -26.2 | [104] | 170 |
| All*                   | Chaco        | 55.0 (2.2)    | -60.9 | -26.0 | [104] | 171 |
| All*                   | Corrientes   | 42.2 (2.2)    | -58.8 | -27.5 | [104] | 172 |
| All*                   | Buenos Aires | 143           | -58.4 | -34.6 | [105] | 173 |

|           |                |                  |        |       |       |     |
|-----------|----------------|------------------|--------|-------|-------|-----|
| All*      | Brasilia       | 13180.8 (3416.8) | -47.9  | -15.8 | [106] | 174 |
| All*      | Bahia          | 150              | -42.0  | -13.4 | [107] | 175 |
| Mestizo*  | Tegucigalpa    | 198              | -87.5  | 15.1  | [108] | 176 |
| All*      | Buenos Aires   | 201.4 (1.0)      | -58.4  | -34.6 | [109] | 177 |
| All*      | Minas Gerais   | 14100.4 (6439.8) | -43.8  | -17.9 | [110] | 178 |
| Mestizo*  | Guatemala City | 200              | -90.5  | 14.6  | [111] | 179 |
| All*      | New Providence | 221              | -77.4  | 25.0  | [112] | 180 |
| Mixed*    | Sao Paulo      | 553.8 (13.4)     | -46.6  | -23.5 | [113] | 181 |
| Garifuna* | Bajamar        | 44.1 (5.3)       | -87.8  | 15.9  | [114] | 182 |
| Garifuna* | Corozal        | 52.5 (1.8)       | -86.1  | 15.4  | [114] | 183 |
| Garifuna* | Iriona         | 64.2 (0.8)       | -85.1  | 15.9  | [114] | 184 |
| Mestizo*  | Mexico City    | 376.6 (1.7)      | -99.1  | 19.4  | [115] | 185 |
| Mestizo*  | Jalisco        | 309              | -103.9 | 20.2  | [116] | 186 |
| Mestizo*  | Puebla         | 312.9 (0.3)      | -101.3 | 25.4  | [116] | 187 |
| Mestizo*  | Yucatan        | 262              | -89.1  | 20.7  | [116] | 188 |
| Mestizo*  | Quindio        | 79.6 (1.1)       | -75.7  | 4.5   | [117] | 189 |
| All*      | Santa Catarina | 2992.0 (14.4)    | -26.9  | -49.4 | [118] | 190 |

---

- 1:** As defined in the original reference (the \* marks the *possibly admixed* populations as per our criteria, see main text)
- 2:** Sample size, in number of individuals. Average sample size (standard deviation) is reported when variable among loci
- 3/4:** Geographic coordinates in decimal degrees

## References:

1. Coudray C, Guitard E, el-Chennawi F, Larrouy G, Dugoujon JM (2007) Allele frequencies of 15 short tandem repeats (STRs) in three Egyptian populations of different ethnic groups. *Forensic Science International* 169: 260-265.
2. Coudray C, Guitard E, Keyser-Tracqui C, Melhaoui M, Cherkaoui M, et al. (2007) Population genetic data of 15 tetrameric short tandem repeats (STRs) in Berbers from Morocco. *Forensic Science International* 167: 81-86.
3. Cherni L, Loueslati Yaacoubi B, Pereira L, Alves C, Khodjet-El-Khil H, et al. (2005) Data for 15 autosomal STR markers (Powerplex 16 System) from two Tunisian populations: Kesra (Berber) and Zriba (Arab). *Forensic Science International* 147: 101-106.
4. Abdin L, Shimada I, Brinkmann B, Hohoff C (2003) Analysis of 15 short tandem repeats reveals significant differences between the Arabian populations from Morocco and Syria. *Leg Med (Tokyo)* 5 Suppl 1: S150-155.
5. Omran GA, Ruttly GN, Jobling MA (2009) Genetic variation of 15 autosomal STR loci in Upper (Southern) Egyptians. *Forensic Sci Int Genet* 3: e39-44.
6. Muro T, Fujihara J, Imamura S, Nakamura H, Yasuda T, et al. (2008) Allele frequencies for 15 STR loci in Ovambo population using AmpFISTR Identifiler Kit. *Leg Med (Tokyo)* 10: 157-159.
7. Kido A, Dobashi Y, Fujitani N, Hara M, Susukida R, et al. (2007) Population data on the AmpF/STR Identifiler loci in Africans and Europeans from South Africa. *Forensic Science International* 168: 232-235.
8. Alves C, Gusmao L, Lopez-Parra AM, Soledad Mesa M, Amorim A, et al. (2005) STR allelic frequencies for an African population sample (Equatorial Guinea) using AmpFISTR Identifiler and Powerplex 16 kits. *Forensic Science International* 148: 239-242.
9. Belezza S, Alves C, Reis F, Amorim A, Carracedo A, et al. (2004) 17 STR data (AmpF/STR Identifiler and Powerplex 16 System) from Cabinda (Angola). *Forensic Science International* 141: 193-196.
10. Alves C, Gusmao L, Damasceno A, Soares B, Amorim A (2004) Contribution for an African autosomic STR database (AmpF/STR Identifiler and Powerplex 16 System) and a report on genotypic variations. *Forensic Science International* 139: 201-205.
11. Goncalves R, Jesus J, Fernandes AT, Brehm A (2002) Genetic profile of a multi-ethnic population from Guine-Bissau (west African coast) using the new PowerPlex 16 System kit. *Forensic Science International* 129: 78-80.
12. Tofanelli S, Boschi I, Bertoneri S, Coia V, Taglioli L, et al. (2003) Variation at 16 STR loci in Rwandans (Hutu) and implications on profile frequency estimation in Bantu-speakers. *Int J Legal Med* 117: 121-126.
13. Forward BW, Eastman MW, Nyambo TB, Ballard RE (2008) AMPFISTR Identifiler STR allele frequencies in Tanzania, Africa. *Journal of Forensic Sciences* 53: 245.
14. Gomes V, Sanchez-Diz P, Alves C, Gomes I, Amorim A, et al. (2009) Population data defined by 15 autosomal STR loci in Karamoja population (Uganda) using AmpF/STR Identifiler kit. *Forensic Sci Int Genet* 3: e55-58.
15. Tillmar AO, Backstrom G, Montelius K (2009) Genetic variation of 15 autosomal STR loci in a Somali population. *Forensic Sci Int Genet* 4: e19-20.
16. Alshamali F, Alkhayat AQ, Budowle B, Watson ND (2005) STR population diversity in nine ethnic populations living in Dubai. *Forensic Science International* 152: 267-279.
17. Cakir AH, Celebioglu A, Altunbas S, Yardimci E (2003) Allele frequencies for 15 STR loci in Van-Agri districts of the Eastern Anatolia region of Turkey. *Forensic Science International* 135: 60-63.
18. Akbasak BS, Budowle B, Reeder DJ, Redman J, Kline MC (2001) Turkish population data with the CODIS multiplex short tandem repeat loci. *Forensic Science International* 123: 227-229.

19. Al-Obaidli A, Sabbagh A, Pravin S, Krishnamoorthy R (2009) Present day inbreeding does not forbid the forensic utility of commonly explored STR loci: a case study of native Qataris. *Forensic Sci Int Genet* 4: e11-13.
20. Hohoff C, Schurenkamp M, Borchers T, Eppink M, Brinkmann B (2006) Meiosis study in a population sample from Afghanistan: allele frequencies and mutation rates of 16 STR loci. *Int J Legal Med* 120: 300-302.
21. Kraaijenbrink T, van Driem GL, Opgenort JR, Tuladhar NM, de Knijff P (2007) Allele frequency distribution for 21 autosomal STR loci in Nepal. *Forensic Science International* 168: 227-231.
22. Ota M, Droma Y, Basnyat B, Katsuyama Y, Asamura H, et al. (2007) Allele frequencies for 15 STR loci in Tibetan populations from Nepal. *Forensic Science International* 169: 234-238.
23. Dobashi Y, Kido A, Fujitani N, Susukida R, Oya M (2003) Population data of nine STR loci, D3S1358, vWA, FGA, TH01, TPOX, CSF1PO, D5S818, D13S317 and D7S820, in Bangladeshis and Indonesians. *Forensic Science International* 135: 72-74.
24. Mastana SS, Murry B, Sachdeva MP, Das K, Young D, et al. (2007) Genetic variation of 13 STR loci in the four endogamous tribal populations of Eastern India. *Forensic Science International* 169: 266-273.
25. Sahoo S, Kashyap VK (2002) Genetic variation at 15 autosomal microsatellite loci in the three highly endogamous tribal populations of Orissa, India. *Forensic Science International* 130: 189-193.
26. Ashma R, Kashyap VK (2002) Genetic polymorphism at 15 STR loci among three important subpopulation of Bihar, India. *Forensic Science International* 130: 58-62.
27. Kashyap VK, Sarkar N, Trivedi R (2002) Allele frequencies for STR loci of the Powerplex 16 multiplex system in five endogamous populations of India. *Forensic Science International* 126: 178-186.
28. Rajkumar R, Kashyap VK (2002) Distribution of alleles of 15 STR loci of the Powerplex 16 Multiplex system in four predominant population groups of South India. *Forensic Science International* 126: 173-177.
29. Rakha A, Yu B, Hadi S, Li S (2008) Genetic analysis of Kashmiri Muslim population living in Pakistan. *Leg Med (Tokyo)* 10: 216-219.
30. Dubey B, Meganathan PR, Eaaswarkhanth M, Vasulu TS, Haque I (2009) Forensic STR profile of two endogamous populations of Madhya Pradesh, India. *Leg Med (Tokyo)* 11: 41-44.
31. Roy S, Eaaswarkhanth M, Dubey B, Haque I (2008) Autosomal STR variations in three endogamous populations of West Bengal, India. *Leg Med (Tokyo)* 10: 326-332.
32. Singh L, Thangaraj K, Chaubey G, Singh VK, Reddy AG, et al. (2006) Genetic profile of nine autosomal STR loci among Halakki and Kunabhi populations of Karnataka, India. *Journal of Forensic Sciences* 51: 190-192.
33. Seah LH, Jeevan NH, Othman MI, Jaya P, Ooi YS, et al. (2003) STR Data for the AmpFISTR Identifiler loci in three ethnic groups (Malay, Chinese, Indian) of the Malaysian population. *Forensic Science International* 138: 134-137.
34. De Ungria MC, Roby RK, Tabbada KA, Rao-Coticone S, Tan MM, et al. (2005) Allele frequencies of 19 STR loci in a Philippine population generated using AmpFISTR multiplex and ALF singleplex systems. *Forensic Science International* 152: 281-284.
35. Shimada I, Brinkmann B, Tuyen NQ, Hohoff C (2002) Allele frequency data for 16 STR loci in the Vietnamese population. *Int J Legal Med* 116: 246-248.
36. Rerkamnuaychoke B, Rinthachai T, Shotivaranon J, Jomsawat U, Siriboonpiputtana T, et al. (2006) Thai population data on 15 tetrameric STR loci-D8S1179, D21S11, D7S820, CSF1PO, D3S1358, TH01, D13S317, D16S539, D2S1338, D19S433, vWA, TPOX, D18S51, D5S818 and FGA. *Forensic Science International* 158: 234-237.

37. Lim SE, Tan-Siew WF, Syn CK, Ang HC, Chow ST, et al. (2005) Genetic data for the 13 CODIS STR loci in Singapore Indians. *Forensic Science International* 148: 65-67.
38. Ang HC, Sornarajah R, Lim SE, Syn CK, Tan-Siew WF, et al. (2005) STR data for the 13 CODIS loci in Singapore Malays. *Forensic Science International* 148: 243-245.
39. Syn CK, Chuah SY, Ang HC, Lim SE, Tan-Siew WF, et al. (2005) Genetic data for the 13 CODIS STR loci in Singapore Chinese. *Forensic Science International* 152: 285-288.
40. Yong RY, Aw LT, Yap EP (2004) Allele frequencies of 15 STR loci of three main ethnic populations in Singapore using an in-house marker panel. *Forensic Science International* 141: 175-183.
41. Maruyama S, Minaguchi K, Takezaki N, Nambiar P (2008) Population data on 15 STR loci using AmpF/STR Identifiler kit in a Malay population living in and around Kuala Lumpur, Malaysia. *Leg Med (Tokyo)* 10: 160-162.
42. Suadi Z, Siew LC, Tie R, Hui WB, Asam A, et al. (2007) STR data for the AmpFISTR Identifiler loci from the three main ethnic indigenous population groups (Iban, Bidayuh, and Melanau) in Sarawak, Malaysia. *Journal of Forensic Sciences* 52: 231-234.
43. Decorte R, Engelen M, Larno L, Nelissen K, Gilissen A, et al. (2004) Belgian population data for 15 STR loci (AmpFISTR SGM Plus and AmpFISTR profiler PCR amplification kit). *Forensic Science International* 139: 211-213.
44. Egyed B, Furedi S, Angyal M, Balogh I, Kalmar L, et al. (2006) Analysis of the population heterogeneity in Hungary using fifteen forensically informative STR markers. *Forensic Science International* 158: 244-249.
45. Vecchio C, Garofano L, Saravo L, Spitaleri S, Iacovacci G, et al. (2004) Allele frequencies for CODIS loci in a Sicilian population sample. *Int Congress Ser*: 136-138.
46. Paredes M, Crespillo M, Luque JA, Valverde JL (2003) STR frequencies for the PowerPlex 16 System Kit in a population from Northeast Spain. *Forensic Science International* 135: 75-78.
47. Perez-Miranda AM, Alfonso-Sanchez MA, Kalantar A, Pena JA, Pancorbo MM, et al. (2005) Allelic frequencies of 13 STR loci in autochthonous Basques from the province of Vizcaya (Spain). *Forensic Science International* 152: 259-262.
48. Sanz P, Farfan MJ, Prieto V, Torres Y, Lopez-Soto M (2001) STR data for the AmpFISTR Profiler Plus and COfiler loci from the maghreb (North Africa). *Forensic Science International* 121: 199-200.
49. Camacho MV, Benito C, Figueiras AM (2007) Allelic frequencies of the 15 STR loci included in the AmpFISTR Identifiler PCR Amplification Kit in an autochthonous sample from Spain. *Forensic Science International* 173: 241-245.
50. Coudray C, Calderon R, Guitard E, Ambrosio B, Gonzalez-Martin A, et al. (2007) Allele frequencies of 15 tetrameric short tandem repeats (STRs) in Andalusians from Huelva (Spain). *Forensic Science International* 168: e21-24.
51. Fernandes AT, Brehm A, Alves C, Gusmao L, Amorim A (2002) Genetic profile of the Madeira Archipelago population using the new PowerPlex16 System kit. *Forensic Science International* 125: 281-283.
52. Velosa RG, Fernandes AT, Brehm A (2002) Genetic profile of the Acores Archipelago population using the new PowerPlex (R) 16 System Kit. *Forensic Science International* 129: 68-71.
53. Pinheiro MF, Caine L, Pontes L, Abrantes D, Lima G, et al. (2005) Allele frequencies of sixteen STRs in the population of Northern Portugal. *Forensic Science International* 148: 221-223.
54. Veselinovic I, Kubat M, Furac I, Skavic J, Martinovic Klaric I, et al. (2004) Allele frequencies of the 15 AmpF ISTR Identifiler loci in the population of Vojvodina Province, Serbia and Montenegro. *Int J Legal Med* 118: 184-186.

55. Havas D, Jeran N, Efremovska L, Dordevic D, Rudan P (2007) Population genetics of 15 AmpfISTR Identifiler loci in Macedonians and Macedonian Romani (Gypsy). *Forensic Science International* 173: 220-224.
56. Rebala K, Wysocka J, Kapinska E, Cybulska L, Mikulich AI, et al. (2007) Belarusian population genetic database for 15 autosomal STR loci. *Forensic Science International* 173: 235-237.
57. Konjhodzic R, Kubat M, Skavic J (2004) Bosnian population data for the 15 STR loci in the Power Plex 16 kit. *Int J Legal Med* 118: 119-121.
58. Marjanovic D, Bakal N, Pojskic N, Kapur L, Drobnic K, et al. (2006) Allele frequencies for 15 short tandem repeat loci in a representative sample of Bosnians and Herzegovinians. *Forensic Science International* 156: 79-81.
59. Novokmet N, Pavcec Z (2007) Genetic polymorphisms of 15 AmpFISTR identifiler loci in Romani population from Northwestern Croatia. *Forensic Science International* 168: e43-46.
60. Szczerkowska Z, Kapinska E, Wysocka J, Cybulska L (2004) Northern Polish population data and forensic usefulness of 15 autosomal STR loci. *Forensic Science International* 144: 69-71.
61. Kuzniar P, Ploski R (2004) STR data for the power plex-16 loci in a population from Central Poland. *Forensic Science International* 139: 261-263.
62. Soltyszewski I, Spolnicka M, Kartasinska E, Konarzewska M, Pepinski W, et al. (2006) Genetic variation of STR loci D3S1358, TH01, D21S11, D18S51, Penta E, D5S818, D13S317, D7S820, D16S539, CSF1PO, Penta D, vWA, D8S1179, TPOX and FGA by GenePrint PowerPlex 16 in a Polish population. *Forensic Science International* 159: 241-243.
63. Kubat M, Skavic J, Behluli I, Nuraj B, Bekteshi T, et al. (2004) Population genetics of the 15 AmpF/STR identifiler loci in kosovo albanians. *International Journal of Legal Medicine* 118: 115-118.
64. Perez-Miranda AM, Herrera RJ (2005) Genetic data on 13 STR loci in the Andalusian (South Spain) population. *Leg Med (Tokyo)* 7: 201-203.
65. Montelius K, Karlsson AO, Holmlund G (2008) STR data for the AmpFISTR Identifiler loci from Swedish population in comparison to European, as well as with non-European population. *Forensic Sci Int Genet* 2: e49-52.
66. Sanchez-Diz P, Menounos PG, Carracedo A, Skitsa I (2008) 16 STR data of a Greek population. *Forensic Sci Int Genet* 2: e71-72.
67. Sotak M, Petrejckova E, Bernasovska J, Bernasovsky I, Sovicova A, et al. (2008) Genetic variation analysis of 15 autosomal STR loci in Eastern Slovak Caucasian and Romany (Gypsy) population. *Forensic Sci Int Genet* 3: e21-25.
68. Jacewicz R, Jedrzejczyk M, Ludwikowska M, Berent J (2008) Population database on 15 autosomal STR loci in 1000 unrelated individuals from the Lodz region of Poland. *Forensic Sci Int Genet* 2: e1-3.
69. Piatek J, Jacewicz R, Ossowski A, Parafiniuk M, Berent J (2008) Population genetics of 15 autosomal STR loci in the population of Pomorze Zachodnie (NW Poland). *Forensic Sci Int Genet* 2: e41-43.
70. Zhivotovsky LA, Veremeichyk VM, Kuzub NN, Atramentova LA, Udina IG, et al. (2009) A reference data base on STR allele frequencies in the Belarus population developed from paternity cases. *Forensic Sci Int Genet* 3: e107-109.
71. Haliti N, Carapina M, Masic M, Strinovic D, Klaric IM, et al. (2009) Evaluation of population variation at 17 autosomal STR and 16 Y-STR haplotype loci in Croatians. *Forensic Sci Int Genet* 3: e137-138.
72. Lopes V, Serra A, Gamero J, Sampaio L, Balsa F, et al. (2009) Allelic frequency distribution of 17 STRs from Identifiler and PowerPlex-16 in Central Portugal area and the Azores archipelago. *Forensic Sci Int Genet* 4: e1-7.

73. Zhivotovsky LA, Akhmetova VL, Fedorova SA, Zhirkova VV, Khusnutdinova EK (2009) An STR database on the Volga-Ural population. *Forensic Sci Int Genet* 3: e133-136.
74. Zhivotovsky LA, Malyarchuk BA, Derenko MV, Wozniak M, Grzybowski T (2009) Developing STR databases on structured populations: the native South Siberian population versus the Russian population. *Forensic Sci Int Genet* 3: e111-116.
75. Eckhoff C, Walsh SJ, Buckleton JS (2007) Population data from sub-populations of the Northern Territory of Australia for 15 autosomal short tandem repeat (STR) loci. *Forensic Science International* 171: 237-249.
76. Budowle B, Chidambaram A, Strickland L, Beheim CW, Taft GM, et al. (2002) Population studies on three Native Alaska population groups using STR loci. *Forensic Science International* 129: 51-57.
77. Gross AM, Budowle B (2006) Minnesota population data on 15 STR loci using the Identifiler kit. *Journal of Forensic Sciences* 51: 1410-1413.
78. Hara M, Yamamoto Y, Takada A, Saito K, Kido A, et al. (2004) Population data for 15 STR loci D3S1358, TH01, D21S11, D18S51, Penta E, D5S818, D13S317, D7S820, D16S539, CSF1PO, Penat D, vWA, D8S1179, TPOX and FGA in Japanese. *Progress in Forensic Genetics* 10 1261: 204-206.
79. Maity B, Nunga SC, Kashyap VK (2003) Genetic polymorphism revealed by 13 tetrameric and 2 pentameric STR loci in four Mongoloid tribal population. *Forensic Science International* 132: 216-222.
80. Yan J, Shen C, Li Y, Yu X, Xiong X, et al. (2007) Genetic analysis of 15 STR loci on Chinese Tibetan in Qinghai Province. *Forensic Science International* 169: e3-6.
81. Chan KM, Chiu CT, Tsui P, Wong DM, Fung WK (2005) Population data for the Identifier 15 STR loci in Hong Kong Chinese. *Forensic Science International* 152: 307-309.
82. Hu SP, Wu DQ, Xu XH, Liu JW, Li B (2005) Genetic profile of 15 STR loci in the Min Nan population in Southeast China. *Forensic Science International* 152: 263-265.
83. Liu C, Wang H (2006) STR data for the 15 loci from three minority populations in Guangxi municipality in South China. *Forensic Science International* 162: 49-52.
84. Zhang H, Li Y, Jiang J, Zhang J, Wu J, et al. (2007) Analysis of 15 STR loci in Chinese population from Sichuan in West China. *Forensic Science International* 171: 222-225.
85. Gao Y, Zhang Z, Wang Z, Bian S (2005) Genetic data of 15 STR forensic loci in eastern Chinese population. *Forensic Science International* 154: 78-80.
86. Deng Y, Zhu B, Yu X, Li Y, Fang J, et al. (2007) Genetic polymorphisms of 15 STR loci of Chinese Dongxiang and Salar ethnic minority living in Qinghai Province of China. *Leg Med (Tokyo)* 9: 38-42.
87. Zeng ZS, Zheng XD, Zhu YL, Wang ZQ, Xiang ZD, et al. (2007) Population genetic data of 15 STR loci in Han population of Henan province (central China). *Leg Med (Tokyo)* 9: 30-32.
88. Zhu BF, Shen CM, Wu QJ, Deng YJ (2008) Population data of 15 STR loci of Chinese Yi ethnic minority group. *Leg Med (Tokyo)* 10: 220-224.
89. Wei H, Zhao Q, Li S (2006) Genetic polymorphism for the PowerPlex 16 system from the Chinese Tujia Ethnic Minority Group. *Journal of Forensic Sciences* 51: 709-710.
90. Liao G, Liu T, Ying B, Sun L, Zou Y, et al. (2008) Population genetic study of 15 STR loci in a Chinese population. *Journal of Forensic Sciences* 53: 252-253.
91. Kraaijenbrink T, Zuniga S, Su B, Shi H, Xiao CJ, et al. (2008) Allele frequency distribution of 21 forensic autosomal STRs in 7 populations from Yunnan, China. *Forensic Sci Int Genet* 3: e11-12.
92. Wu YM, Zhang XN, Zhou Y, Chen ZY, Wang XB (2008) Genetic polymorphisms of 15 STR loci in Chinese Han population living in Xi'an city of Shaanxi Province. *Forensic Sci Int Genet* 2: e15-18.
93. Wang R, Liu L, Zhao J, Peng C (2008) Genetic distribution on 15 STR loci from a population of Southern Liaoning in northeast of China. *Forensic Sci Int Genet* 2: e25-26.

94. Gonzalez-Andrade F, Sanchez QD, Martinez-Jarreta B (2006) Genetic analysis of the Amerindian Kichwas and Afroamerican descendents populations from Ecuador characterised by 15 STR-PCR polymorphisms. *Forensic Science International* 160: 231-235.
95. Perez L, Hau J, Izarra F, Ochoa O, Zubiato U, et al. (2003) Allele frequencies for the 13 CODIS STR loci in Peru. *Forensic Science International* 132: 164-165.
96. Rodriguez A, Arrieta G, Sanou I, Vargas MC, Garcia O, et al. (2007) Population genetic data for 18 STR loci in Costa Rica. *Forensic Science International* 168: 85-88.
97. Morales JA, Monterrosa JC, Puente J (2004) Population genetic data from El Salvador (Central America) using AmpFISTR Identifiler PCR Amplification Kit. *International Congress Series* 1261: 223-225.
98. Lovo-Gomez J, Salas A, Carracedo A (2007) Microsatellite autosomal genotyping data in four indigenous populations from El Salvador. *Forensic Science International* 170: 86-91.
99. Chiurillo MA, Morales A, Mendes AM, Lander N, Tovar F, et al. (2003) Genetic profiling of a central Venezuelan population using 15 STR markers that may be of forensic importance. *Forensic Science International* 136: 99-101.
100. Bernal LP, Borjas L, Zabala W, Portillo MG, Fernandez E, et al. (2006) Genetic variation of 15 STR autosomal loci in the Maracaibo population from Venezuela. *Forensic Science International* 161: 60-63.
101. Vargas CI, Castillo A, Gil AM, Pico AL, García O (2003) Population genetic data for 13 STR loci in a northeast Colombian (department of Santander) population. *J Forensic Sci: Int Congress Series* 1239: 197-200.
102. Gaviria A, Ibarra AA, Jaramillo N, Palacio OD, Acosta MA, et al. (2004) Nineteen autosomal microsatellite data from Antioquia (Colombia). *Forensic Science International* 143: 69-71.
103. Toscanini U, Berardi G, Raimondi E (2003) STR data for PowerPlex 16 System from Neuquen population, SW Argentina. *Forensic Science International* 134: 219-221.
104. Marino M, Sala A, Corach D (2006) Population genetic analysis of 15 autosomal STRs loci in the central region of Argentina. *Forensic Science International* 161: 72-77.
105. Berardi G, Toscanini U, Raimondi E (2003) STR data for PowerPlex 16 System from Buenos Aires population, Argentina. *Forensic Science International* 134: 222-224.
106. Whittle MR, Romano NL, Negreiros VA (2004) Updated Brazilian genetic data, together with mutation rates, on 19 STR loci, including D10S1237. *Forensic Science International* 139: 207-210.
107. Santos MV, Anjos MJ, Andrade L, Vide MC, Corte-Real F, et al. (2004) Population genetic data for the STR loci using the AmpFISTR® identifiler™ kit in Bahia, Brazil. *Int Congress Ser* 1261: 219-222.
108. Matamoros M, Pinto Y, Inda FJ, Garcia O (2008) Population genetic data for 15 STR loci (Identifiler kit) in Honduras. *Leg Med (Tokyo)* 10: 281-283.
109. Bozzo WR, Pena MA, Ortiz MI, Lojo MM (2007) Genetic data from Powerplex 16 system and Identifiler kits from Buenos Aires province (Argentina). *Leg Med (Tokyo)* 9: 151-153.
110. del Castillo DM, Perone C, de Queiroz AR, Mourao PH, de Souza Vasconcellos L, et al. (2009) Populational genetic data for 15 STR markers in the Brazilian population of Minas Gerais. *Leg Med (Tokyo)* 11: 45-47.
111. Martinez-Espin E, Martinez-Gonzalez LJ, Fernandez-Rosado F, Entrala C, Alvarez JC, et al. (2006) Guatemala mestizo population data on 15 STR loci (Identifiler Kit). *Journal of Forensic Sciences* 51: 1216-1218.
112. Simms TM, Garcia C, Mirabal S, McCartney Q, Herrera RJ (2008) The genetic legacy of the Transatlantic Slave Trade in the island of New Providence. *Forensic Sci Int Genet* 2: 310-317.

113. Fridman C, dos Santos PC, Kohler P, Garcia CF, Lopez LF, et al. (2008) Brazilian population profile of 15 STR markers. *Forensic Sci Int Genet* 2: e1-4.
114. Herrera-Paz EF, Garcia LF, Aragon-Nieto I, Paredes M (2008) Allele frequencies distributions for 13 autosomal STR loci in 3 Black Carib (Garifuna) populations of the Honduran Caribbean coasts. *Forensic Sci Int Genet* 3: e5-10.
115. Juarez-Cedillo T, Zuniga J, Acuna-Alonzo V, Perez-Hernandez N, Rodriguez-Perez JM, et al. (2008) Genetic admixture and diversity estimations in the Mexican Mestizo population from Mexico City using 15 STR polymorphic markers. *Forensic Sci Int Genet* 2: e37-39.
116. Rubi-Castellanos R, Anaya-Palafox M, Mena-Rojas E, Bautista-Espana D, Munoz-Valle JF, et al. (2009) Genetic data of 15 autosomal STRs (Identifiler kit) of three Mexican Mestizo population samples from the States of Jalisco (West), Puebla (Center), and Yucatan (Southeast). *Forensic Sci Int Genet* 3: e71-76.
117. Porras L, Beltran L, Ortiz T, Sanchez-Diz P, Carracedo A, et al. (2008) Genetic polymorphism of 15 STR loci in central western Colombia. *Forensic Sci Int Genet* 2: e7-8.
118. Ocampos M, Fernandes RC, Latorre AF, da Silva CM, Korndorfer FP, et al. (2009) 15 STR loci frequencies in the population from Santa Catarina, Southern Brazil. *Forensic Sci Int Genet* 3: e129-131.
