# Supplementary material for: Human Neutral Genetic Variation and Forensic STR Data
Source: PubMed Central journal article supplement (PMC3504113; doi:10.1371/journal.pone.0049666), 2012-11-21
Supplement: pone.0049666.s005.pdf [file pone.0049666.s005.pdf]

**Table S2: Genotype dataset description.** The designations and information presented for populations are based on the original publications (<http://cracs.fc.up.pt/popaffiliator>). Geographic coordinates were assigned in this work.

| <i>Group</i>                        | <i>Population description</i> <sup>1</sup> | <i>Sample Size</i> <sup>2</sup> | <i>Longitude</i> <sup>3</sup> | <i>Latitude</i> <sup>4</sup> | <i>Reference</i> | <i>ID</i> |
|-------------------------------------|--------------------------------------------|---------------------------------|-------------------------------|------------------------------|------------------|-----------|
| <i>North Africa<br/>(NAF)</i>       | Libya                                      | 103                             | 17.6                          | 27.1                         | [1]              | 1         |
|                                     | Egypt Upper                                | 265                             | 30.4                          | 23.1                         | [2]              | 2         |
|                                     | Morocco                                    | 209                             | -6.9                          | 31.5                         | [3]              | 3         |
| <i>Sub-saharan Africa<br/>(SAF)</i> | Namibia Bantus                             | 195                             | 16.9                          | -22.5                        | [4]              | 4         |
|                                     | Somalia                                    | 404                             | 45.5                          | 3.9                          | [5]              | 5         |
| <i>Southwest Asia<br/>(SWAS)</i>    | UAE                                        | 217                             | 54.3                          | 23.6                         | Unpublished      | 6         |
|                                     | Yemen                                      | 99                              | 46.7                          | 15.3                         | Unpublished      | 7         |
|                                     | Iran                                       | 104                             | 54.0                          | 32.3                         | Unpublished      | 8         |
|                                     | Kuwait                                     | 502                             | 47.5                          | 29.4                         | [6]              | 9         |

|                         |                        |      |       |      |             |    |
|-------------------------|------------------------|------|-------|------|-------------|----|
|                         | Oman                   | 99   | 56.4  | 20.0 | Unpublished | 10 |
|                         | Saudi Arabia           | 106  | 43.7  | 24.7 | Unpublished | 11 |
|                         | Portugal Azores        | 475  | -27.3 | 38.7 | [7]         | 12 |
|                         | Italy                  | 441  | 13.1  | 42.4 | [8]         | 13 |
|                         | Portugal Center        | 2125 | -8.3  | 40.1 | [7]         | 14 |
|                         | Belgium Flemish        | 272  | 4.4   | 50.8 | [9]         | 15 |
|                         | Poland                 | 1600 | 19.3  | 52.1 | [10]        | 16 |
| <b><i>Europe</i></b>    | Romania                | 222  | 25.2  | 45.6 | [11]        | 17 |
| <b><i>(EUR)</i></b>     | Greece                 | 300  | 22.4  | 39.0 | [12]        | 18 |
|                         | Eastern Slovak         | 138  | 21.6  | 48.9 | [13]        | 19 |
|                         | Portugal South         | 48   | -8.1  | 37.5 | Unpublished | 20 |
|                         | Spain                  | 114  | -3.3  | 40.2 | [14]        | 21 |
|                         | Russia - European part | 384  | 35.8  | 56.1 | [15]        | 22 |
|                         | China Chongming Island | 1000 | 121.6 | 31.6 | [16]        | 23 |
|                         | China Han              | 604  | 103.5 | 28.7 | [17]        | 24 |
|                         | China Lisu             | 25   | 98.9  | 25.9 | [17]        | 25 |
| <b><i>East Asia</i></b> | China Nu               | 36   | 99.4  | 26.5 | [17]        | 26 |
| <b><i>(EAS)</i></b>     | China Tibetan          | 31   | 100.6 | 25.7 | [17]        | 27 |
|                         | Siberia Korean*        | 49   | 129.1 | 35.8 | [18]        | 28 |
|                         | Thailand               | 210  | 101.1 | 15.4 | [19]        | 29 |

|                                                      |                     |     |       |      |             |    |
|------------------------------------------------------|---------------------|-----|-------|------|-------------|----|
| <i>Central Asia</i><br>(CAS)                         | Siberia Altay       | 68  | 90.0  | 52.0 | [18]        | 30 |
|                                                      | Siberia Altay Kizhi | 80  | 89.6  | 51.5 | [18]        | 31 |
|                                                      | Siberia Buryat      | 78  | 107.9 | 52.2 | [18]        | 32 |
|                                                      | Siberia Khakas      | 51  | 94.2  | 55.5 | [18]        | 33 |
|                                                      | Siberia Khamnigan   | 95  | 112.7 | 50.8 | [18]        | 34 |
|                                                      | Siberia Mongol      | 42  | 106.2 | 49.3 | [18]        | 35 |
|                                                      | Siberia Sojot       | 29  | 104.8 | 50.9 | [18]        | 36 |
|                                                      | Siberia Tofalar     | 35  | 97.9  | 54.0 | [18]        | 37 |
|                                                      | Siberia Tuva        | 80  | 95.2  | 51.9 | [18]        | 38 |
| <i>Northeast Asia</i><br>(NEAS)                      | Siberia Chukchi     | 15  | 171.7 | 66.9 | [18]        | 39 |
|                                                      | Siberia Koryak      | 32  | 160.3 | 64.0 | [18]        | 40 |
|                                                      | Siberia Even        | 14  | 151.0 | 61.3 | [18]        | 41 |
| <i>Central and South</i><br><i>America</i><br>(CSAM) | Ecuador Kichwas     | 151 | -79.3 | -2.5 | Unpublished | 42 |
|                                                      | Ecuador Waoranis    | 34  | -78.9 | 0.6  | Unpublished | 43 |

**1: As defined in the original reference (the \* marks the *possibly admixed* populations as per our criteria, see main text)**

**2: Number of individuals**

**3/4: Geographic coordinates in decimal degrees**

## References:

1. Immel D, Erhuma M, Mustafa T, Kleiber M, Klitschar M (2006) Population genetic analysis in a Libyan population using the PowerPlex 16 system. *Int Congress Ser* 1288: 421-423
2. Omran GA, Ruddy GN, Jobling MA (2009) Genetic variation of 15 autosomal STR loci in Upper (Southern) Egyptians. *Forensic Sci Int Genet* 3: e39-44.
3. Coudray C, Guitard E, Keyser-Tracqui C, Melhaoui M, Cherkaoui M, et al. (2007) Population genetic data of 15 tetrameric short tandem repeats (STRs) in Berbers from Morocco. *Forensic Science International* 167: 81-86.
4. Muro T, Fujihara J, Imamura S, Nakamura H, Yasuda T, et al. (2008) Allele frequencies for 15 STR loci in Ovambo population using AmpFISTR Identifiler Kit. *Leg Med (Tokyo)* 10: 157-159.
5. Tillmar AO, Backstrom G, Montelius K (2009) Genetic variation of 15 autosomal STR loci in a Somali population. *Forensic Sci Int Genet* 4: e19-20.
6. Alenzi M, Goodwin W, Ismael S, Hadi S (2008) STR data for the AmpFISTR Identifiler loci in Kuwaiti population. *Leg Med (Tokyo)* 10: 321-325.
7. Lopes V, Serra A, Gamero J, Sampaio L, Balsa F, et al. (2009) Allelic frequency distribution of 17 STRs from Identifiler and PowerPlex-16 in Central Portugal area and the Azores archipelago. *Forensic Sci Int Genet* 4: e1-7.
8. Brisighelli F, Capelli C, Boschi I, Garagnani P, Lareu MV, et al. (2009) Allele frequencies of fifteen STRs in a representative sample of the Italian population. *Forensic Sci Int Genet* 3: e29-30.
9. Mertens G, Mommers N, Cardoen E, De Bruyn I, Jehaes E, et al. (2006) Flemish population genetic analysis using 15 STRs of the Identifiler® kit. *Int Congress Ser* 1288: 328-330.
10. Jacewicz R, Jedrzejczyk M, Ludwikowska M, Berent J (2008) Population database on 15 autosomal STR loci in 1000 unrelated individuals from the Lodz region of Poland. *Forensic Sci Int Genet* 2: e1-3.
11. Marian C, Anghel A, Bel SM, Ferencz BK, Ursoniu S, et al. (2007) STR data for the 15 AmpFISTR identifiler loci in the Western Romanian population. *Forensic Science International* 170: 73-75.
12. Sanchez-Diz P, Acosta MA, Fonseca D, Fernandez M, Gomez Y, et al. (2009) Population data on 15 autosomal STRs in a sample from Colombia. *Forensic Sci Int Genet* 3: e81-82.
13. Sotak M, Petrejckova E, Bernasovska J, Bernasovsky I, Sovicova A, et al. (2008) Genetic variation analysis of 15 autosomal STR loci in Eastern Slovak Caucasian and Romany (Gypsy) population. *Forensic Sci Int Genet* 3: e21-25.
14. Coudray C, Calderon R, Guitard E, Ambrosio B, Gonzalez-Martin A, et al. (2007) Allele frequencies of 15 tetrameric short tandem repeats (STRs) in Andalusians from Huelva (Spain). *Forensic Science International* 168: e21-24.
15. Zhivotovsky LA, Veremeichyk VM, Kuzub NN, Atramentova LA, Udina IG, et al. (2009) A reference data base on STR allele frequencies in the Belarus population developed from paternity cases. *Forensic Sci Int Genet* 3: e107-109.
16. Li C, Li L, Zhao Z, Lin Y, Que T, et al. (2009) Genetic polymorphism of 17 STR loci for forensic use in Chinese population from Shanghai in East China. *Forensic Sci Int Genet* 3: e117-118.
17. Kraaijenbrink T, Zuniga S, Su B, Shi H, Xiao CJ, et al. (2008) Allele frequency distribution of 21 forensic autosomal STRs in 7 populations from Yunnan, China. *Forensic Sci Int Genet* 3: e11-12.
18. Zhivotovsky LA, Malyarchuk BA, Derenko MV, Wozniak M, Grzybowski T (2009) Developing STR databases on structured populations: the native South Siberian population versus the Russian population. *Forensic Sci Int Genet* 3: e111-116.
19. Rerkamnuaychoke B, Rinthachai T, Shotivaranon J, Jomsawat U, Siriboonpiputtana T, et al. (2006) Thai population data on 15 tetrameric STR loci-D8S1179, D21S11, D7S820,

CSF1PO, D3S1358, TH01, D13S317, D16S539, D2S1338, D19S433, vWA, TPOX, D18S51, D5S818 and FGA. *Forensic Science International* 158: 234-237.
