# Supplementary material for: Human Neutral Genetic Variation and Forensic STR Data
Source: PubMed Central journal article supplement (PMC3504113; doi:10.1371/journal.pone.0049666), 2012-11-21
Supplement: pone.0049666.s006.pdf [file pone.0049666.s006.pdf]

**Table S3: Comparison of average genetic diversity among geographic groups.**

Pairwise Wilcoxon tests of the difference in average genetic diversity between geographic groups. Tables A and B: average genetic diversity measured by  $V_p$  and  $H_e$  in the Frequency dataset. Tables C and D: average genetic diversity measured by  $V_p$  and  $H_e$  in the Genotype dataset. The p-values below 0.05 are represented in bold and italic.

**A**

|             | <i>SAF</i>             | <i>NAF</i> | <i>SWAS</i> | <i>EUR</i>            | <i>SAS</i> | <i>CAS</i> | <i>SEAS</i> | <i>EAS</i> | <i>AUS</i> | <i>NAM</i> | <i>CSAM</i> |
|-------------|------------------------|------------|-------------|-----------------------|------------|------------|-------------|------------|------------|------------|-------------|
| <i>SAF</i>  | -                      | -          | -           | -                     | -          | -          | -           | -          | -          | -          | -           |
| <i>NAF</i>  | 0.78054                | -          | -           | -                     | -          | -          | -           | -          | -          | -          | -           |
| <i>SWAS</i> | <b><i>0.00226</i></b>  | 1          | -           | -                     | -          | -          | -           | -          | -          | -          | -           |
| <i>EUR</i>  | <b><i>7.40E-06</i></b> | 1          | 1           | -                     | -          | -          | -           | -          | -          | -          | -           |
| <i>SAS</i>  | <b><i>0.04877</i></b>  | 1          | 1           | <b><i>0.02834</i></b> | -          | -          | -           | -          | -          | -          | -           |
| <i>CAS</i>  | <b><i>0.00458</i></b>  | 1          | 1           | 0.61179               | 1          | -          | -           | -          | -          | -          | -           |
| <i>SEAS</i> | <b><i>0.00065</i></b>  | 1          | 1           | 1                     | 0.82567    | 1          | -           | -          | -          | -          | -           |
| <i>EAS</i>  | <b><i>0.00702</i></b>  | 1          | 1           | <b><i>0.00016</i></b> | 1          | 1          | 0.29948     | -          | -          | -          | -           |
| <i>AUS</i>  | 1                      | 1          | 1           | 1                     | 1          | 1          | 1           | 1          | -          | -          | -           |
| <i>NAM</i>  | 0.15385                | 1          | 1           | 1                     | 1          | 1          | 1           | 1          | 1          | -          | -           |
| <i>CSAM</i> | 0.10989                | 1          | 1           | 0.05566               | 1          | 1          | 0.73031     | 1          | 1          | 1          | -           |

**B**

|             | <i>SAF</i>            | <i>NAF</i>            | <i>SWAS</i>           | <i>EUR</i>             | <i>SAS</i>            | <i>CAS</i> | <i>SEAS</i> | <i>EAS</i> | <i>AUS</i> | <i>NAM</i> | <i>CSAM</i> |
|-------------|-----------------------|-----------------------|-----------------------|------------------------|-----------------------|------------|-------------|------------|------------|------------|-------------|
| <i>SAF</i>  | -                     | -                     | -                     | -                      | -                     | -          | -           | -          | -          | -          | -           |
| <i>NAF</i>  | 1                     | -                     | -                     | -                      | -                     | -          | -           | -          | -          | -          | -           |
| <i>SWAS</i> | 1                     | 1                     | -                     | -                      | -                     | -          | -           | -          | -          | -          | -           |
| <i>EUR</i>  | 1                     | 1                     | 1                     | -                      | -                     | -          | -           | -          | -          | -          | -           |
| <i>SAS</i>  | 1                     | 1                     | 1                     | 1                      | -                     | -          | -           | -          | -          | -          | -           |
| <i>CAS</i>  | <b><i>0.01244</i></b> | 0.1729                | <b><i>0.00786</i></b> | <b><i>5.90E-05</i></b> | <b><i>0.00124</i></b> | -          | -           | -          | -          | -          | -           |
| <i>SEAS</i> | 1                     | 1                     | 1                     | 1                      | 1                     | 0.07703    | -           | -          | -          | -          | -           |
| <i>EAS</i>  | <b><i>0.00281</i></b> | <b><i>0.04789</i></b> | <b><i>0.0001</i></b>  | <b><i>2.10E-09</i></b> | <b><i>0.00019</i></b> | 1          | 0.07531     | -          | -          | -          | -           |
| <i>AUS</i>  | 1                     | 1                     | 1                     | 1                      | 1                     | 1          | 1           | 1          | -          | -          | -           |
| <i>NAM</i>  | 0.15385               | 0.30769               | 0.15385               | 0.00167                | <b><i>0.04387</i></b> | 1          | 0.16117     | 1          | 1          | -          | -           |
| <i>CSAM</i> | 0.65934               | 1                     | 0.65934               | 0.48761                | 0.28429               | 1          | 1           | 1          | 1          | 1          | -           |

## C

|             | <i>SAF</i> | <i>NAF</i> | <i>SWAS</i> | <i>EUR</i> | <i>CAS</i> | <i>EAS</i> | <i>NEAS</i> | <i>CSAM</i> |
|-------------|------------|------------|-------------|------------|------------|------------|-------------|-------------|
| <i>SAF</i>  | -          | -          | -           | -          | -          | -          | -           | -           |
| <i>NAF</i>  | 1          | -          | -           | -          | -          | -          | -           | -           |
| <i>SWAS</i> | 1          | 1          | -           | -          | -          | -          | -           | -           |
| <i>EUR</i>  | 0.72       | 1          | 1           | -          | -          | -          | -           | -           |
| <i>CAS</i>  | 1          | 1          | 1           | 1          | -          | -          | -           | -           |
| <i>EAS</i>  | 1          | 1          | 1           | 1          | 1          | -          | -           | -           |
| <i>NEAS</i> | 1          | 1          | 1           | 1          | 1          | 1          | -           | -           |
| <i>CSAM</i> | 1          | 1          | 1           | 1          | 1          | 1          | 1           | -           |

## D

|             | <i>SAF</i> | <i>NAF</i> | <i>SWAS</i> | <i>EUR</i>    | <i>CAS</i> | <i>EAS</i> | <i>NEAS</i> | <i>CSAM</i> |
|-------------|------------|------------|-------------|---------------|------------|------------|-------------|-------------|
| <i>SAF</i>  | -          | -          | -           | -             | -          | -          | -           | -           |
| <i>NAF</i>  | 1          | -          | -           | -             | -          | -          | -           | -           |
| <i>SWAS</i> | 1          | 1          | -           | -             | -          | -          | -           | -           |
| <i>EUR</i>  | 0.7179     | 1          | 1           | -             | -          | -          | -           | -           |
| <i>CAS</i>  | 1          | 1          | 0.0783      | <b>0.0063</b> | -          | -          | -           | -           |
| <i>EAS</i>  | 1          | 0.9333     | 0.2284      | <b>0.007</b>  | 1          | -          | -           | -           |
| <i>NEAS</i> | 1          | 1          | 0.6667      | 0.1538        | 1          | 1          | -           | -           |
| <i>CSAM</i> | 1          | 1          | 1           | 0.7179        | 1          | 1          | 1           | -           |
