# Supplementary material for: Human Neutral Genetic Variation and Forensic STR Data
Source: PubMed Central journal article supplement (PMC3504113; doi:10.1371/journal.pone.0049666), 2012-11-21
Supplement: pone.0049666.s008.pdf [file pone.0049666.s008.pdf]

**Table S5: Comparison of expected heterozygosity among datasets.** Pairwise Wilcoxon tests of the distributions of the expected heterozygosity per sample over loci presented in Figure 5B, with Bonferroni correction. The p-values below 0.05 are represented in bold and italic.

|                              | <i>Pemberton all</i>   | <i>Pemberton high He</i> | <i>Pemberton low He</i> | <i>Frequency (our study)</i> | <i>Genotype (our study)</i> |
|------------------------------|------------------------|--------------------------|-------------------------|------------------------------|-----------------------------|
| <i>Pemberton all</i>         | -                      |                          |                         |                              |                             |
| <i>Pemberton high He</i>     | <b><i>5.50E-06</i></b> | -                        |                         |                              |                             |
| <i>Pemberton low He</i>      | 1                      | <b><i>0.00048</i></b>    | -                       |                              |                             |
| <i>Frequency (our study)</i> | <b><i>2.60E-04</i></b> | 1                        | <b><i>0.01967</i></b>   | -                            |                             |
| <i>Genotype (our study)</i>  | <b><i>0.00026</i></b>  | 1                        | <b><i>0.01692</i></b>   | 1                            | -                           |
